# Supplementary material
Source: PubMed Central journal article supplement (PMC2689781)
Supplement: M800252-MCP200_1.pdf [file M800252-MCP200_1.pdf]

# Supp. Fig 1.

## RCC\_105 Panther Molecular Functions

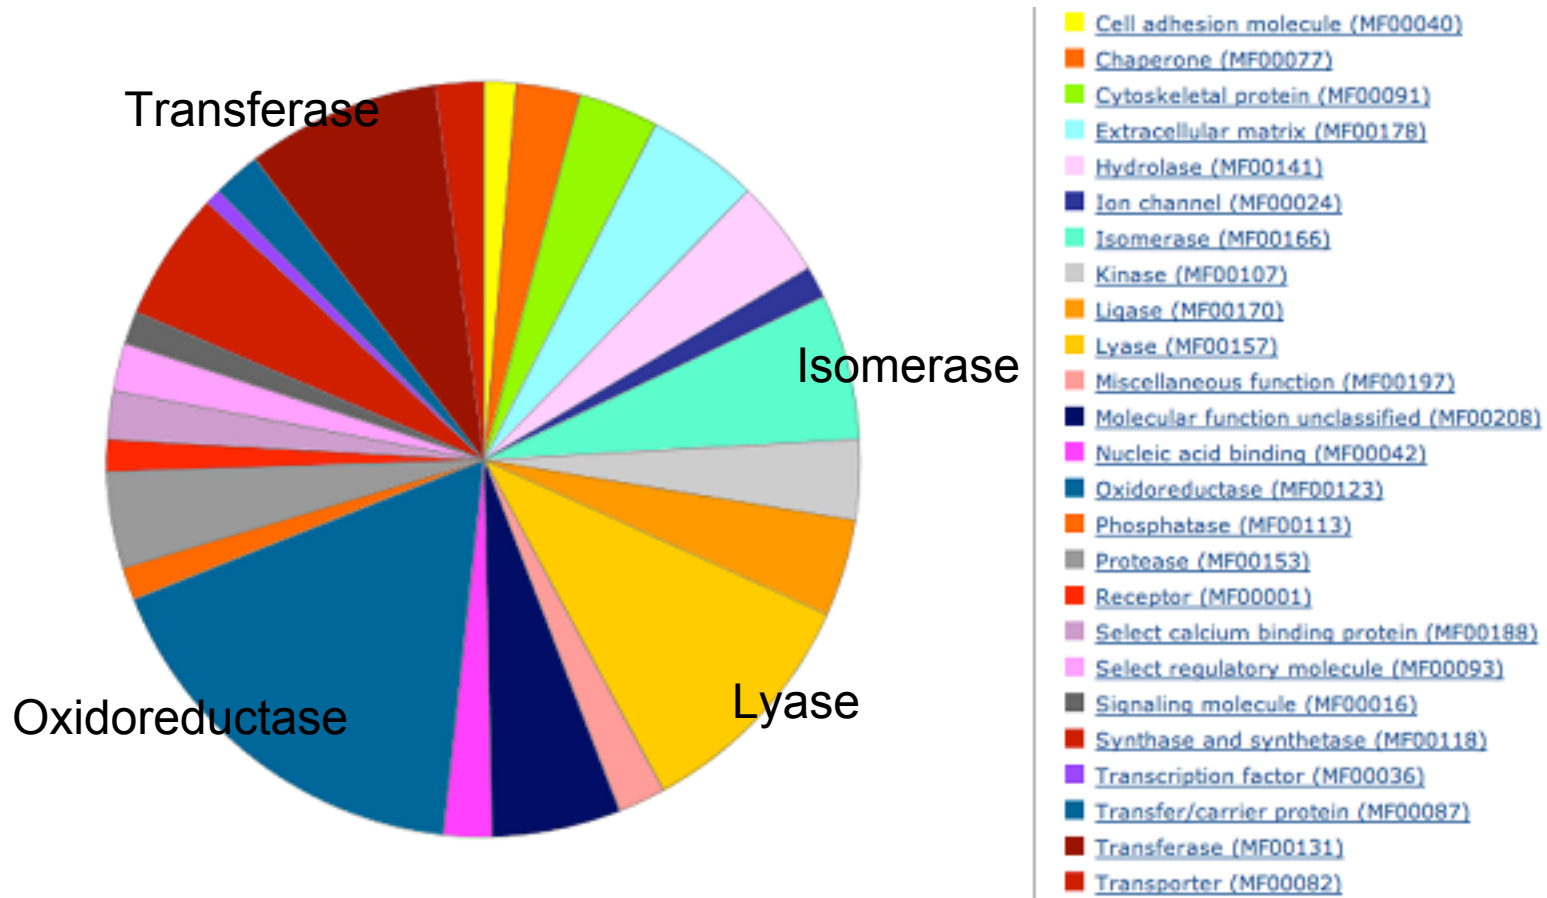

# Supp. Fig. 2

## RCC\_105 Panther Biological Processes

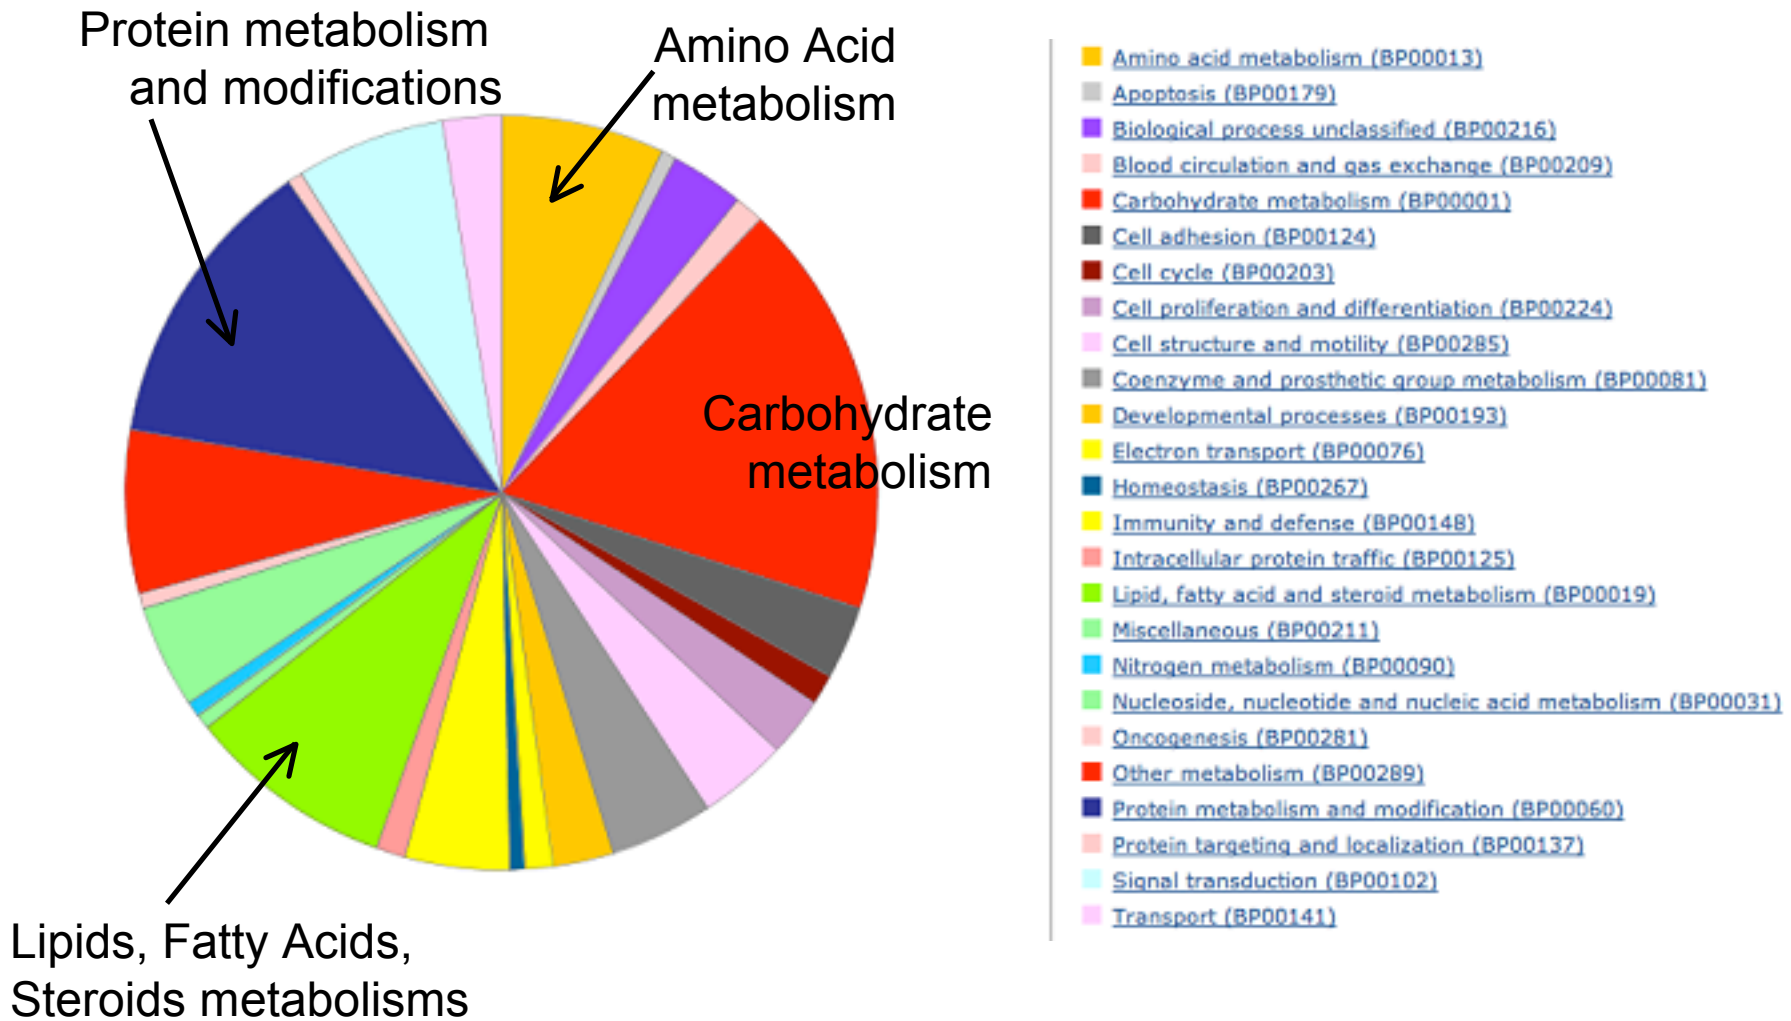

# Supp. Fig. 3

## RCC\_105 Panther Metabolic and Signaling Pathways

5-Hydroxytryptamine degradation

Apoptosis

Integrin signaling pathway

Glycolysis

Fructose Galactose pathway

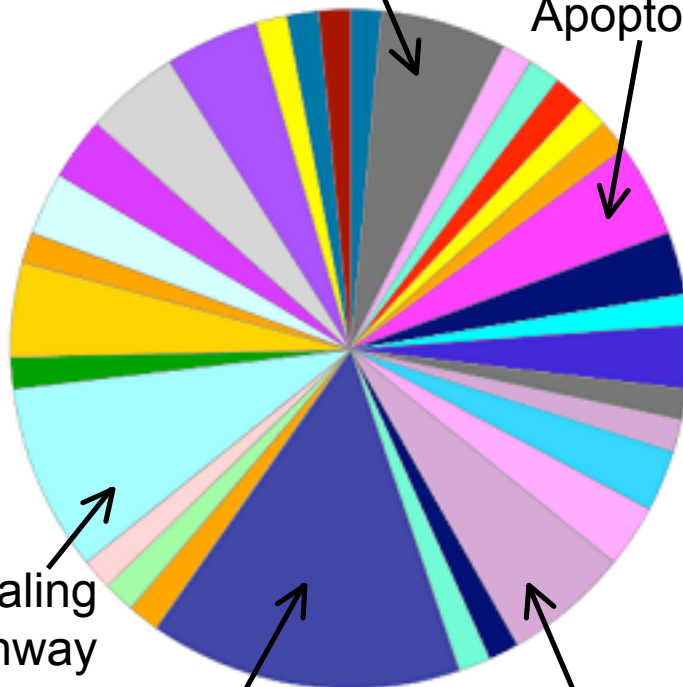

- [5-Hydroxytryptamine biosynthesis \(P04371\)](#)
- [5-Hydroxytryptamine degradation \(P04372\)](#)
- [ATP synthesis \(P02721\)](#)
- [Acetate utilization \(P02722\)](#)
- [Adrenaline and noradrenaline biosynthesis \(P00001\)](#)
- [Alzheimer disease-presenilin pathway \(P00004\)](#)
- [Aminobutyrate degradation \(P02726\)](#)
- [Apoptosis signaling pathway \(P00006\)](#)
- [Arginine biosynthesis \(P02728\)](#)
- [Axon guidance mediated by semaphorins \(P00007\)](#)
- [Blood coagulation \(P00011\)](#)
- [Cytoskeletal regulation by Rho GTPase \(P00016\)](#)
- [Dopamine receptor mediated signaling pathway \(P05912\)](#)
- [EGF receptor signaling pathway \(P00018\)](#)
- [FGF signaling pathway \(P00021\)](#)
- [Fructose galactose metabolism \(P02744\)](#)
- [Gamma-aminobutyric acid synthesis \(P04384\)](#)
- [General transcription by RNA polymerase I \(P00022\)](#)
- [Glycolysis \(P00024\)](#)
- [Heterotrimeric G-protein signalling pathway-Gi alpha and Gs alpha mediated pathway \(P00026\)](#)
- [Histamine synthesis \(P04387\)](#)
- [Huntington disease \(P00029\)](#)
- [Integrin signalling pathway \(P00034\)](#)
- [PI3 kinase pathway \(P00048\)](#)
- [Parkinson disease \(P00049\)](#)
- [Pentose phosphate pathway \(P02762\)](#)
- [Phenylethylamine degradation \(P02766\)](#)
- [Plasminogen activating cascade \(P00050\)](#)
- [Pyrimidine Metabolism \(P02771\)](#)
- [Pyruvate metabolism \(P02772\)](#)
- [Serine glycine biosynthesis \(P02776\)](#)
- [TCA cycle \(P00051\)](#)
- [p53 pathway \(P00059\)](#)
